# Supplementary material for: Contrasting responses of phytoplankton productivity between coastal and offshore surface waters in the Taiwan Strait and the South China Sea to short-term seawater acidification
Source: Copernicus journal article supplement (doi:10.5194/bg-19-2795-2022), 2022-06-03
Supplement: Supplementary file 1 [file bg-19-2795-2022-supplement.zip]

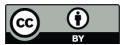

*Supplement of*

**Contrasting responses of phytoplankton productivity between coastal and offshore surface waters in the Taiwan Strait and the South China Sea to short-term seawater acidification**

**Guang Gao et al.**

*Correspondence to:* Kunshan Gao ([ksgao@xmu.edu.cn](mailto:ksgao@xmu.edu.cn))

- [bg-19-2795-2022-supplement-title-page.pdf](#)
- [Supplementary information.docx](#)

The copyright of individual parts of the supplement might differ from the article licence.
